# Supplementary material for: Colorimetric and ratiometric fluorescent chemosensor for fluoride ions based on phenanthroimidazole (PI): spectroscopic, NMR and density functional studies
Source: Royal Society of Chemistry journal article supplement (doi:10.1039/c5ra05327g), 2015-01-01
Supplement: c5ra05327g1.pdf [file c5ra05327g1.pdf]

## Supporting Information

for

### **Colorimetric and Ratiometric Fluorescent Chemosensor for Fluoride Ion Based on Phenanthroline-Imidazole (PI): Spectroscopic, NMR and density functional studies**

Ajit Kumar Mahapatra<sup>\*a</sup>, Parthasarathi Karmakar<sup>a</sup>, Jagannath Roy<sup>a</sup>, Srimanta Manna<sup>a</sup>, Kalipada Maiti<sup>a</sup>, Prithidipa Sahoo<sup>b</sup> and Debasish Mandal<sup>c</sup>

<sup>a</sup>Department of Chemistry, Indian Institute of Engineering Science & Technology

(Formerly Bengal Engineering and Science University), Shibpur, Howrah – 711103, India.

<sup>b</sup>Department of Chemistry, Visva-Bharati University, Santiniketan, Birbhum, West Bengal, India -731235 India.

<sup>c</sup>Department of Chemistry and the Lise Meitner-Minerva Center for Computational Quantum Chemistry, The Hebrew University of Jerusalem, Jerusalem (Israel).

\*Corresponding author: Tel.: +91 33 2668 4561; fax: +91 33 26684564;

*E-mail: mahapatra574@gmail.com*

## Content

|                                                                                                                                    |    |
|------------------------------------------------------------------------------------------------------------------------------------|----|
| 1. $^1\text{H}$ NMR of probe <b>PI</b> ( $d_6$ -DMSO, 400 MHz)                                                                     | S3 |
| 2. ESI-MS $[\text{M}]^+$ spectrum of probe <b>PI</b>                                                                               | S4 |
| 3. $^{13}\text{C}$ NMR spectrum of probe <b>PI</b>                                                                                 | S5 |
| 4. Binding constant curve of probe <b>PI</b> with $\text{F}^-$ determined by UV –Vis method                                        | S6 |
| 5. Job's plot                                                                                                                      | S6 |
| 6. Binding constant curve of probe <b>PI</b> with $\text{F}^-$ determined by fluorescence method                                   | S7 |
| 7. Calculations for detection limit                                                                                                | S7 |
| 8. (a) The changes in UV/Vis spectra of probe <b>PI</b> in DMSO ( $10^{-5}\text{M}$ ) after addition of 120 equiv of $\text{OH}^-$ | S8 |
| (b) Fluorescence (Excitation=392 nm) titration of probe <b>PI</b> with $\text{OH}^-$ in DMSO                                       | S8 |
| 9. Fluorescence titration of probe <b>PI</b> with $\text{F}^-$ in DMSO: $\text{H}_2\text{O}$ (95:5)                                | S8 |
| 10. Computational Study                                                                                                            | S9 |

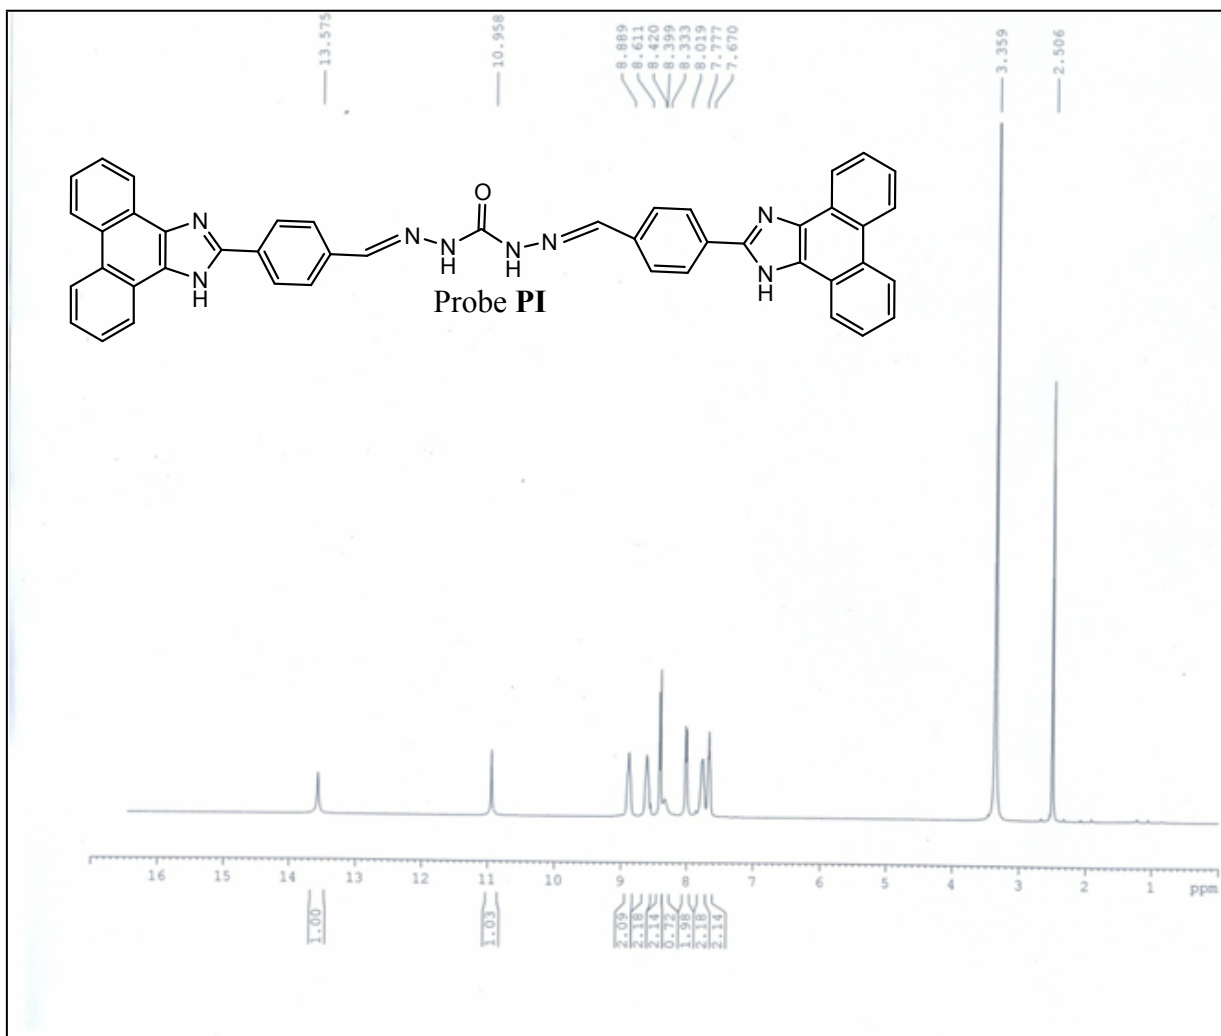

**Fig. S1:**  $^1\text{H}$  NMR of probe **PI**.

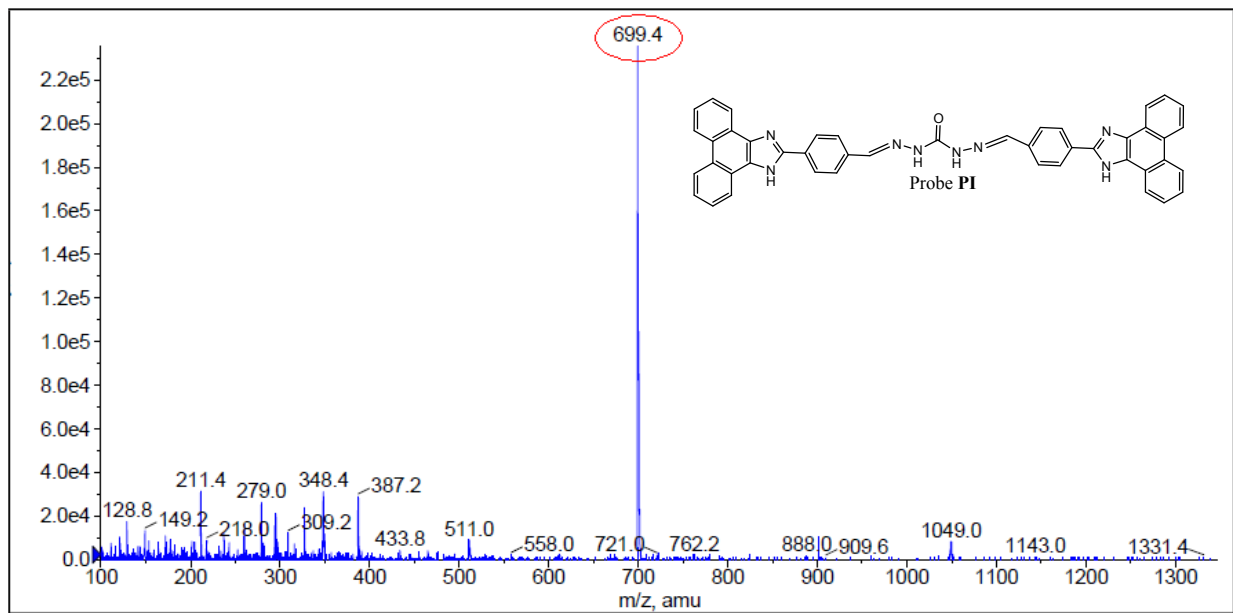

**Fig. S2:** ESI-MS  $[M]^+$  spectrum of probe **PI**

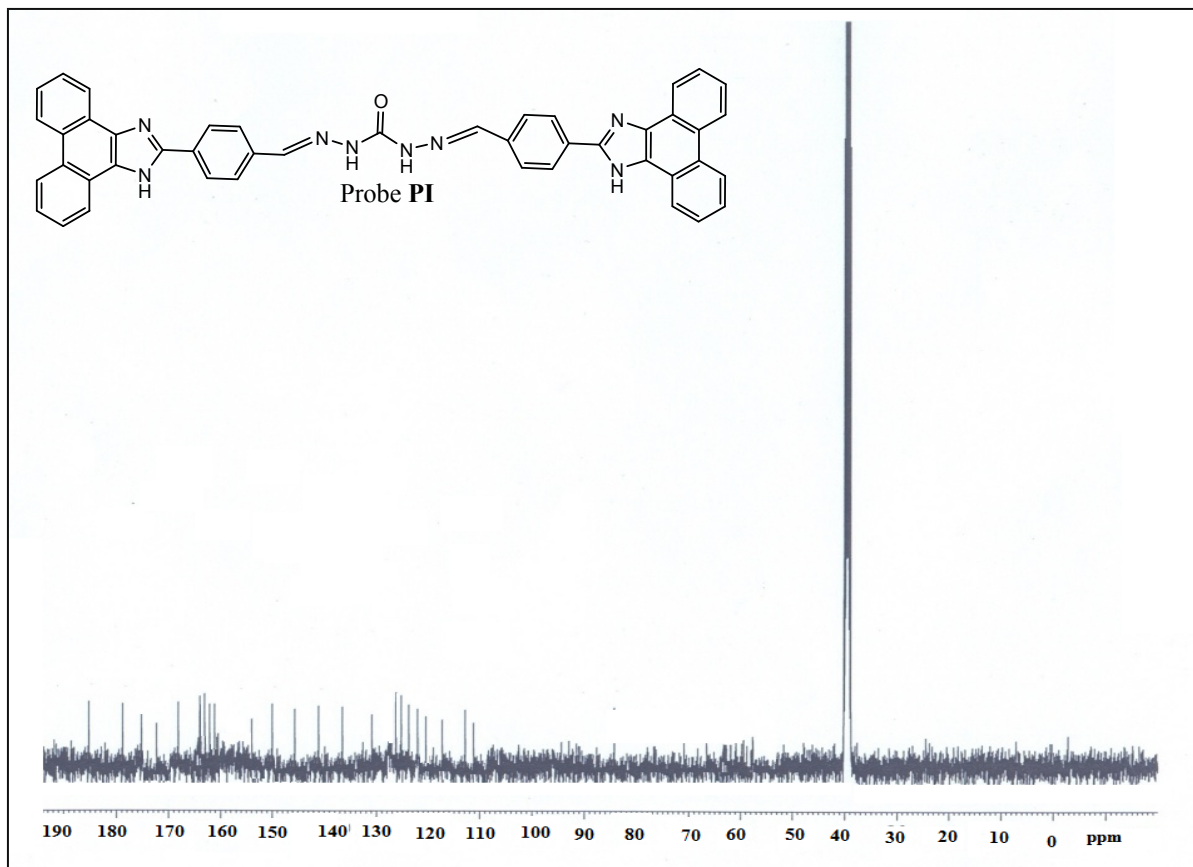

**Fig. S3:**  $^{13}\text{C}$  NMR spectrum of probe **PI**.

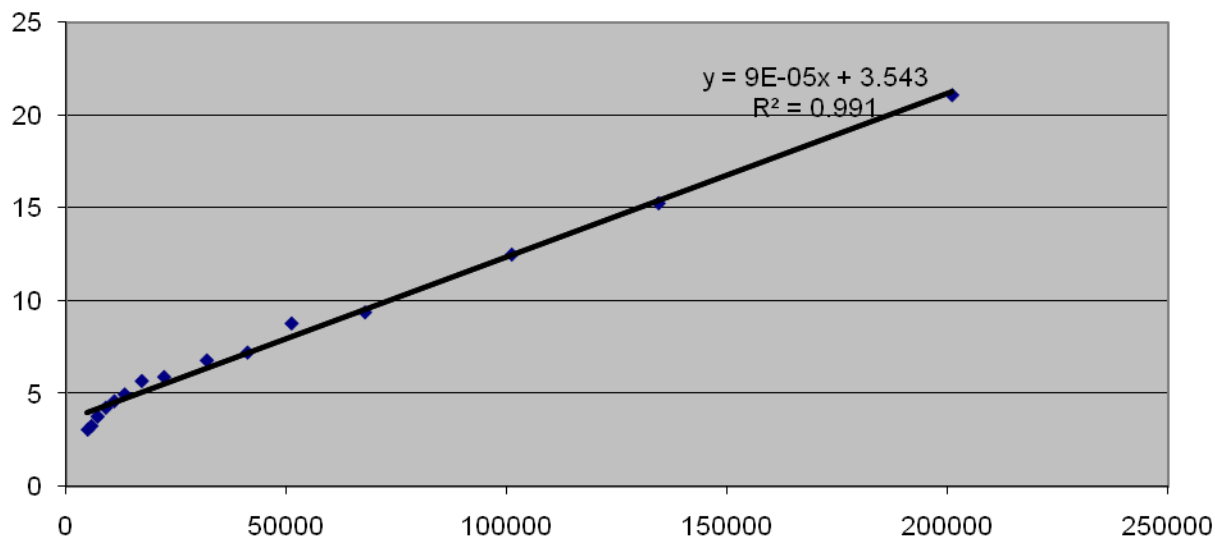

**Fig. S4.** Binding constant curve of probe **PI** with  $F^-$  determined by UV –Vis method.

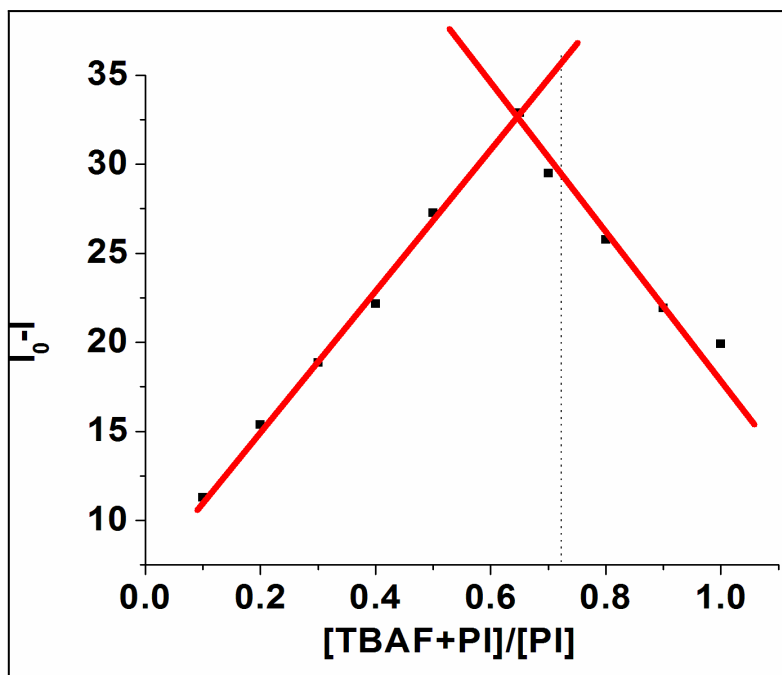

**Fig. S5.** Job's plot for determining the stoichiometry of probe **PI** and  $F^-$  ion by fluorescence method.

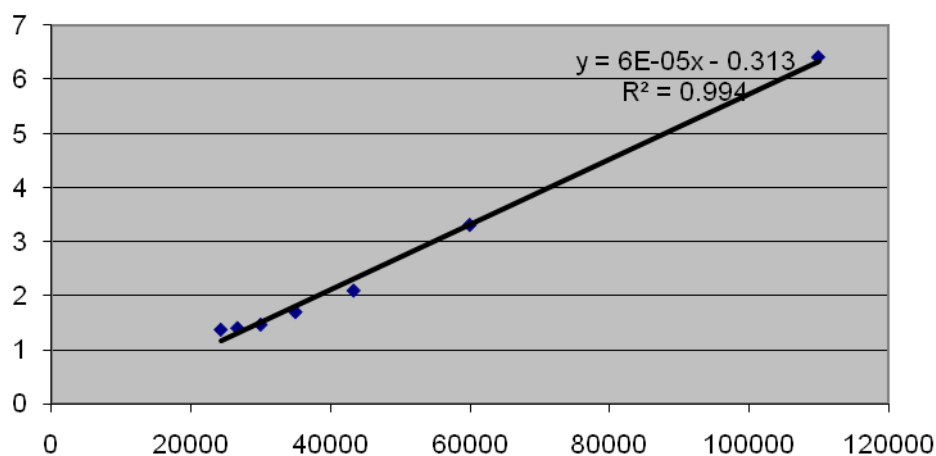

**Fig. S6.** Binding constant curve of Probe **PI** with  $F^-$  determined by fluorescence method.

**Calculations for detection limit:**

The detection limit (DL) of probe **PI** for  $F^-$  were determined from the following equation:

$$DL = K * Sb1/S$$

Where  $K = 2$  or  $3$  (we take  $3$  in this case);  $Sb1$  is the standard deviation of the blank solution;  $S$  is the slope of the calibration curve.

Here, we get  $Sb1=10383$ . Hence detection limit  $=5.2 \mu M$ .

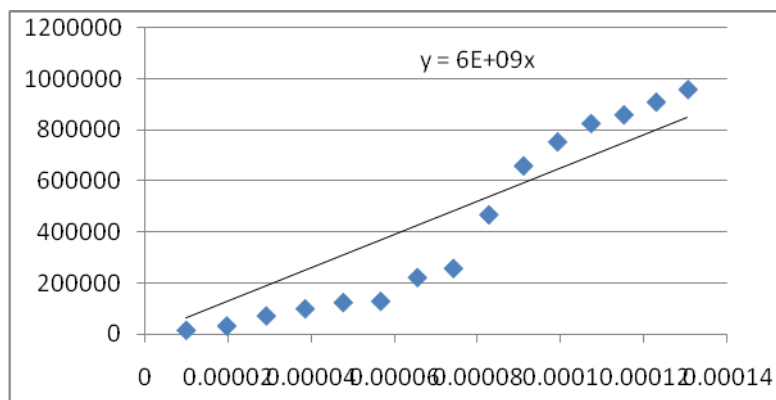

**Fig. S7:** Calibration curve for fluorescence titration of probe **PI** with  $F^-$ .

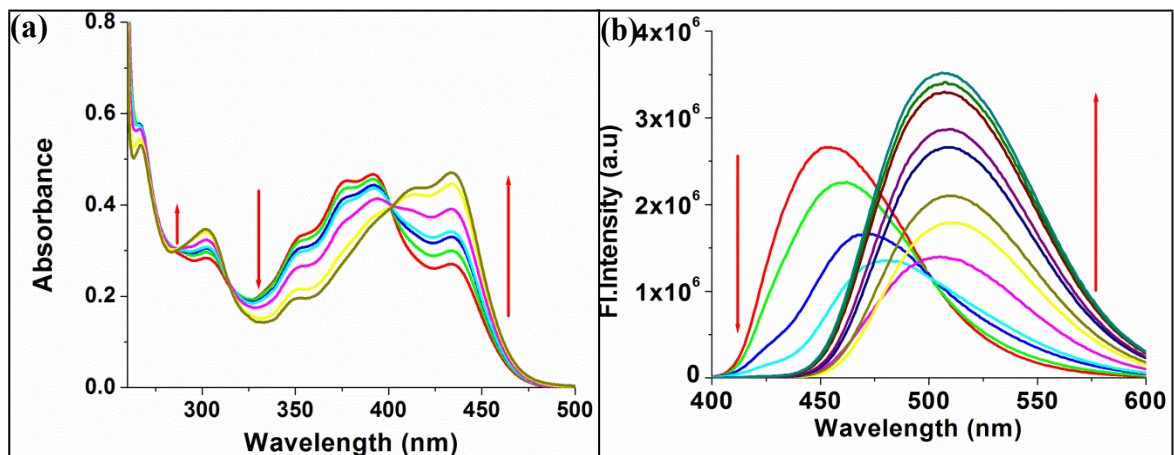

**Fig.S8:** (a) The changes in UV/Vis spectra of probe **PI** in DMSO ( $10^{-5}$ M) after addition of 120 equiv of  $\text{OH}^-$ . (b) Fluorescence (Excitation=392 nm) titration of probe **PI** with  $\text{OH}^-$  (as a TBAOH salt from 0 to 100 equiv) in DMSO.

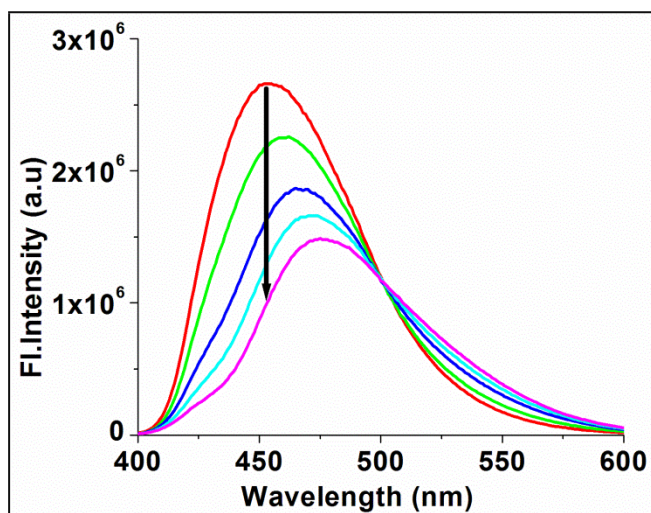

**Fig.S9:** Fluorescence (Excitation=392 nm) titration of probe **PI** with  $\text{F}^-$  (as a TBAF salt from 0 to 100 equiv) in DMSO:  $\text{H}_2\text{O}$  (95:5 v/v).



**Table S1.** Selected electronic excitation energies (eV), oscillator strengths (f), main configurations, and CI Coefficients of the low-lying excited states of CS1 and all the complexes. The data were calculated by TDDFT//B3LYP/6-31+G(d,p) based on the optimized ground state geometries.

| Molecules                                  | Electronic Transition            | Excitation Energy <sup>a</sup> | f <sup>b</sup> | Composition <sup>c</sup> | (composition) % |
|--------------------------------------------|----------------------------------|--------------------------------|----------------|--------------------------|-----------------|
| <b>Probe PI</b>                            |                                  |                                |                |                          |                 |
|                                            | S <sub>0</sub> → S <sub>1</sub>  | 2.8792 eV<br>(430.62 nm)       | 2.3541         | H → L                    | 91.99           |
|                                            | S <sub>0</sub> → S <sub>4</sub>  | 3.4115 eV<br>(363.43 nm)       | 0.3416         | H -1 → L+1               | 92.07           |
|                                            | S <sub>0</sub> → S <sub>9</sub>  | 3.7306 eV(332.34 nm)           | 0.2947         | H-2 → L                  | 64.33           |
| <b>Deprotonated Structure of probe PI-</b> |                                  |                                |                |                          |                 |
|                                            | S <sub>0</sub> → S <sub>1</sub>  | 2.7012 eV(458.99 nm)           | 2.5180         | H → L                    | 93.81           |
|                                            | S <sub>0</sub> → S <sub>6</sub>  | 3.3861 eV(366.16 nm)           | 0.3148         | H-1 → L+1                | 71.11           |
|                                            | S <sub>0</sub> → S <sub>25</sub> | 4.3384 eV(285.78 nm)           | 0.3519         | H-3 → L+3<br>H-2 → L+2   | 33.97           |
|                                            | S <sub>0</sub> → S <sub>32</sub> | 4.4932 eV(275.94 nm)           | 0.3895         | H-5 → L                  | 57.07           |
|                                            | S <sub>0</sub> → S <sub>36</sub> | 4.5768 eV(270.90 nm)           | 0.5110         | H-5 → L+1                | 54.78           |

[a] Only selected excited states were considered. The numbers in parentheses are the excitation energy in wavelength. [b] Oscillator strength (only the  $f > 0.25$  was considered). [c] H stands for HOMO and L stands for LUMO.

## Reference

1. J. Tomasi and M. Persico, *Chem. Rev.*, 1994, **94**, 2027–2094.
2. M. Cossi,; V. Barone,; R. Cammi,; J. Tomasi, *Chem. Phys. Lett.* 1996, **255**, 327–335.
3. V. Barone,; M. Cossi and J. J. Tomasi, *Chem. Phys.* 1997, **107**, 3210–3221.
4. V. Barone,; M. Cossi and J. J. Tomasi, *Comput. Chem.* 1998, **19**, 404–417.
5. M. Cossi and V. J. Barone, *Chem. Phys.* 1998, **109**, 6246–6254.
